# Supplementary material for: Dissemination of Ceftriaxone-Resistant Salmonella Enteritidis Harboring Plasmids Encoding blaCTX-M-55 or blaCTX-M-14 Gene in China
Source: MDPI journal article supplement (doi:10.3390/antibiotics13050456), 2024-05-16
Supplement: s1 [file s1]

## Supplementary Materials

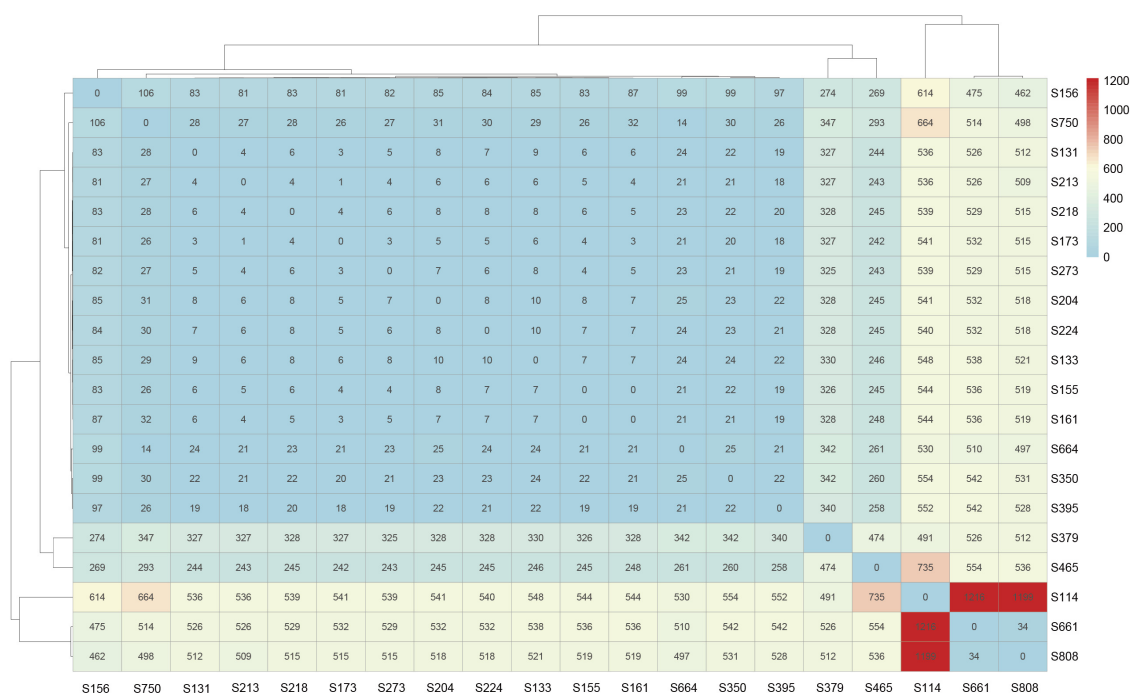

**Figure S1.** Visualization of the number of single nucleotide polymorphism (SNP) variant sites among 20 CRO-RSE.

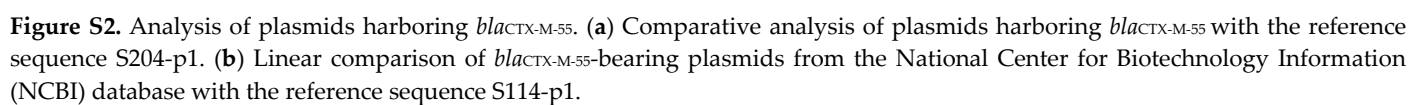

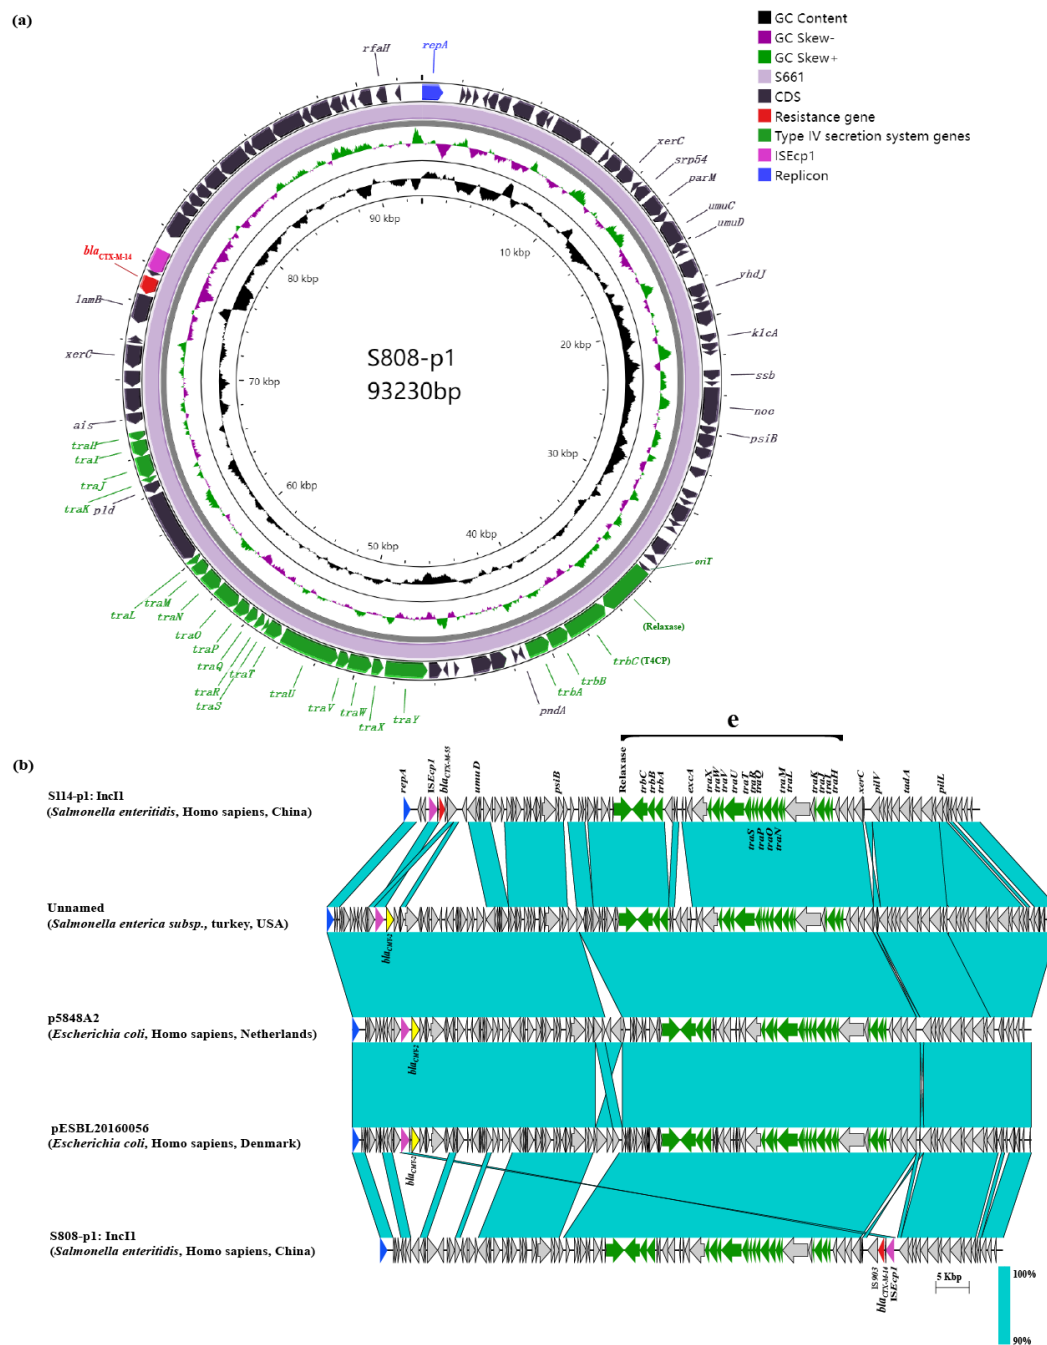

**Figure S3.** Analysis of plasmids harboring *bla*<sub>CTX-M-14</sub>. **(a)** Comparative analysis of the short read sequencing data from S661 with the reference sequence S808-p1. **(b)** Linear comparison of plasmids structurally similar to S808-p1.
